# Supplementary material
Source: HighWire-hosted journal article supplement (https://spcare.bmj.com/highwire/filestream/154052/field_highwire_adjunct_files/0/spcare-2022-003996supp001_data_supplement.pdf)

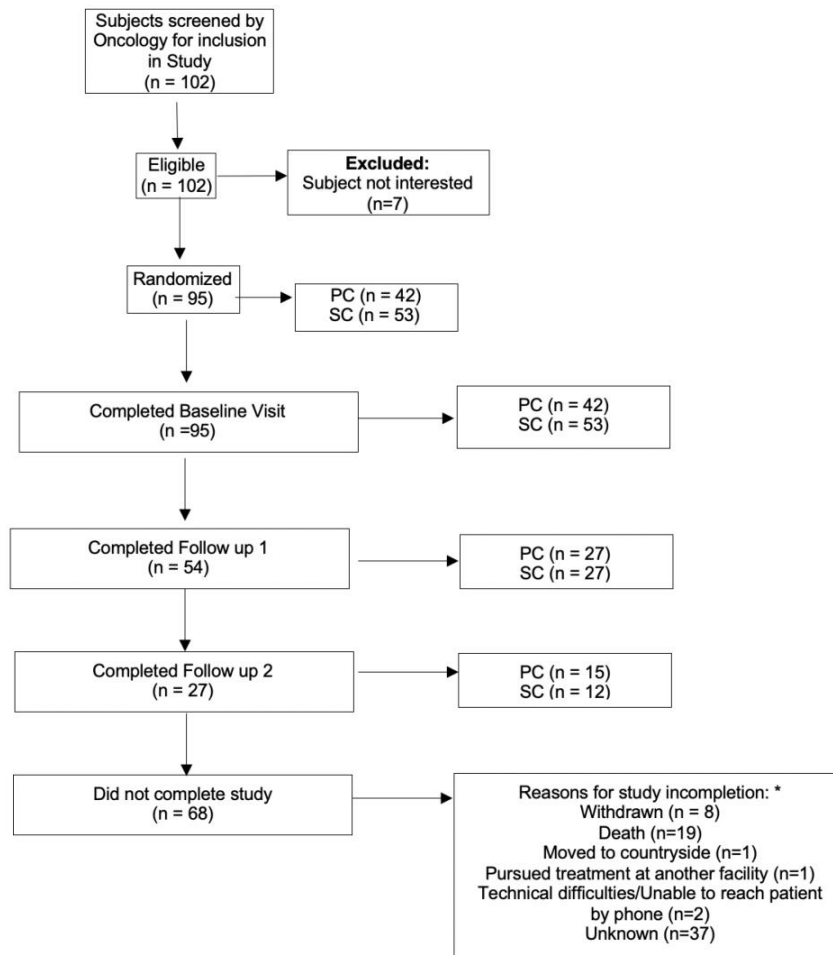

Supplement: spcare-2022-003996supp001_data_supplement.pdf [file spcare-2022-003996supp001_data_supplement.pdf]
